# Supplementary material for: Direct and two-step bioorthogonal probes for Bruton's tyrosine kinase based on ibrutinib: a comparative study
Source: Royal Society of Chemistry journal article supplement (doi:10.1039/c5ob00474h), 2015-01-01
Supplement: c5ob00474h1.pdf [file c5ob00474h1.pdf]

## **Direct and two-step bioorthogonal probes for Bruton's tyrosine kinase based on ibrutinib: a comparative study**

Nora Liu<sup>a</sup>, Sascha Hoogendoorn<sup>a</sup>, Bas van de Kar<sup>b</sup>, Allard Kaptein<sup>b</sup>, Tjeerd Barf<sup>b</sup>, Christoph Driessen<sup>c</sup>, Dmitri V. Filippov<sup>a</sup>, Gijsbert A. van der Marel<sup>a</sup>, Mario van der Stelt<sup>a\*</sup> and Herman S. Overkleeft<sup>a\*</sup>

**Supporting figures**

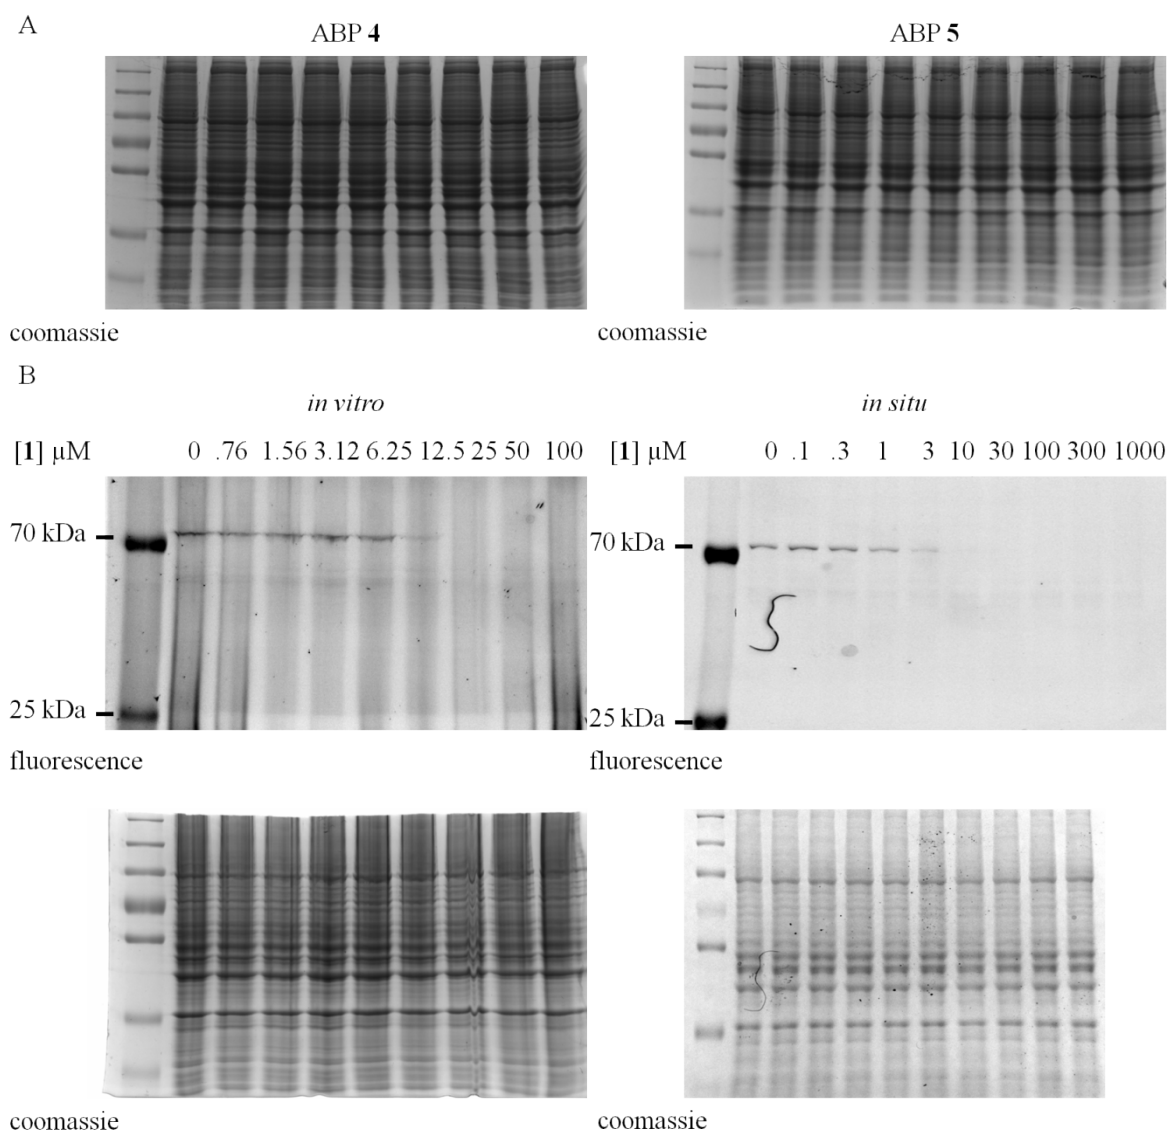

**Figure S1.** A) BTK labelling efficiency of direct ABPs **4** and **5** in Ramos cell extract. Coomassie staining was used as a loading control. B) Competition experiments of ibrutinib **1** versus fluorescent ABP **4** in Ramos cell lysates and living cells. Proteins were analysed by SDS-PAGE using detection by in-gel fluorescent readout. Coomassie staining was used as a loading control. Lane 1: Dual Color protein standard.

A

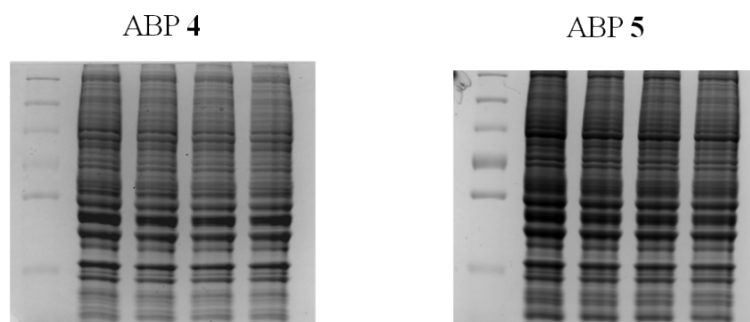

B

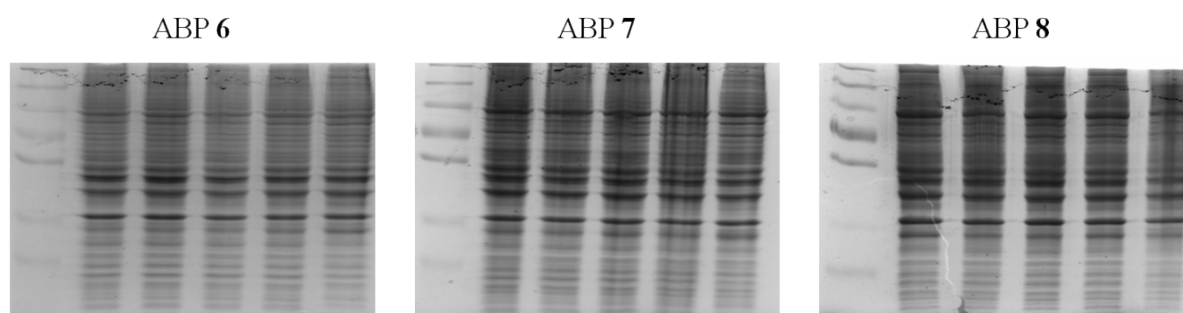

**Figure S2.** A) *In situ* labelling of BTK in Ramos cells by **4** and **5**. Coomassie staining was used as a loading control. B) Competition experiments of BODIPY-FL-ibrutinib **4** versus compounds **6-8** in Ramos cells. Coomassie staining was used as a loading control. Lane 1: Dual Color protein standard.

A

ABP 6

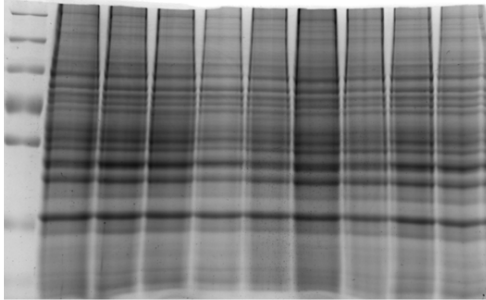

B

ABP 7

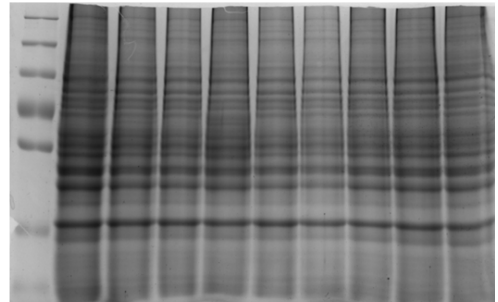

C

ABP 8

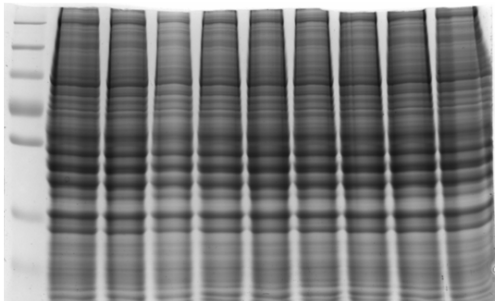

D

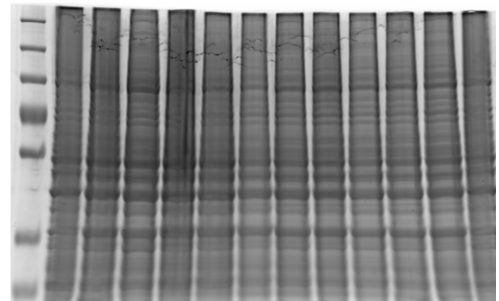

**Figure S3.** A-C) *In vitro* two-step bioorthogonal labelling of BTK in Ramos cell extract using reagent pairs (6/22), (7/23) and (8/24). Coomassie staining was used as a loading control. D) Two-step bioorthogonal profiling of BTK activity by different ligation strategies. Coomassie staining was used as a loading control. Lane 1: Dual Color protein standard.
